# Supplementary material for: In situ second-harmonic generation mediated photodynamic therapy by micelles co-encapsulating coordination nanoparticle and photosensitizer
Source: Royal Society of Chemistry journal article supplement (doi:10.1039/c7ra07334h), 2017-01-01
Supplement: c7ra07334h2.pdf [file c7ra07334h2.pdf]

*In-situ Second-Harmonic Generation Mediated  
Photodynamic Therapy by Micelles Co-  
encapsulating Coordination Nanoparticle and  
Photosensitizer*

**Xuyang Zhou<sup>a</sup>, Yang Chen<sup>a</sup>, Jian Su<sup>b</sup>, Xiaohe Tian<sup>c</sup>, Yonghuang Luo<sup>a\*</sup>, Lei Luo<sup>a\*</sup>**

<sup>a</sup> College of Pharmaceutical Sciences, Southwest University, Chongqing 400715, P.R. China.

<sup>b</sup> State Key Laboratory of Coordination Chemistry, School of Chemistry and Chemical Engineering, Nanjing University, Nanjing 210093, P. R. China.

<sup>c</sup> Department of Chemistry, Key Laboratory of Functional Inorganic Material Chemistry of Anhui Province, Anhui University, Hefei 230039, P. R. China.

\*Corresponding authors:

Prof. Yonghuang Luo and Dr. Lei Luo

College of Pharmaceutical Sciences, Southwest University, Chongqing 400716, P.R. China. Email: luoyonghuang@126.com Drluolei@swu.edu.cn Tel: +86 02368251225

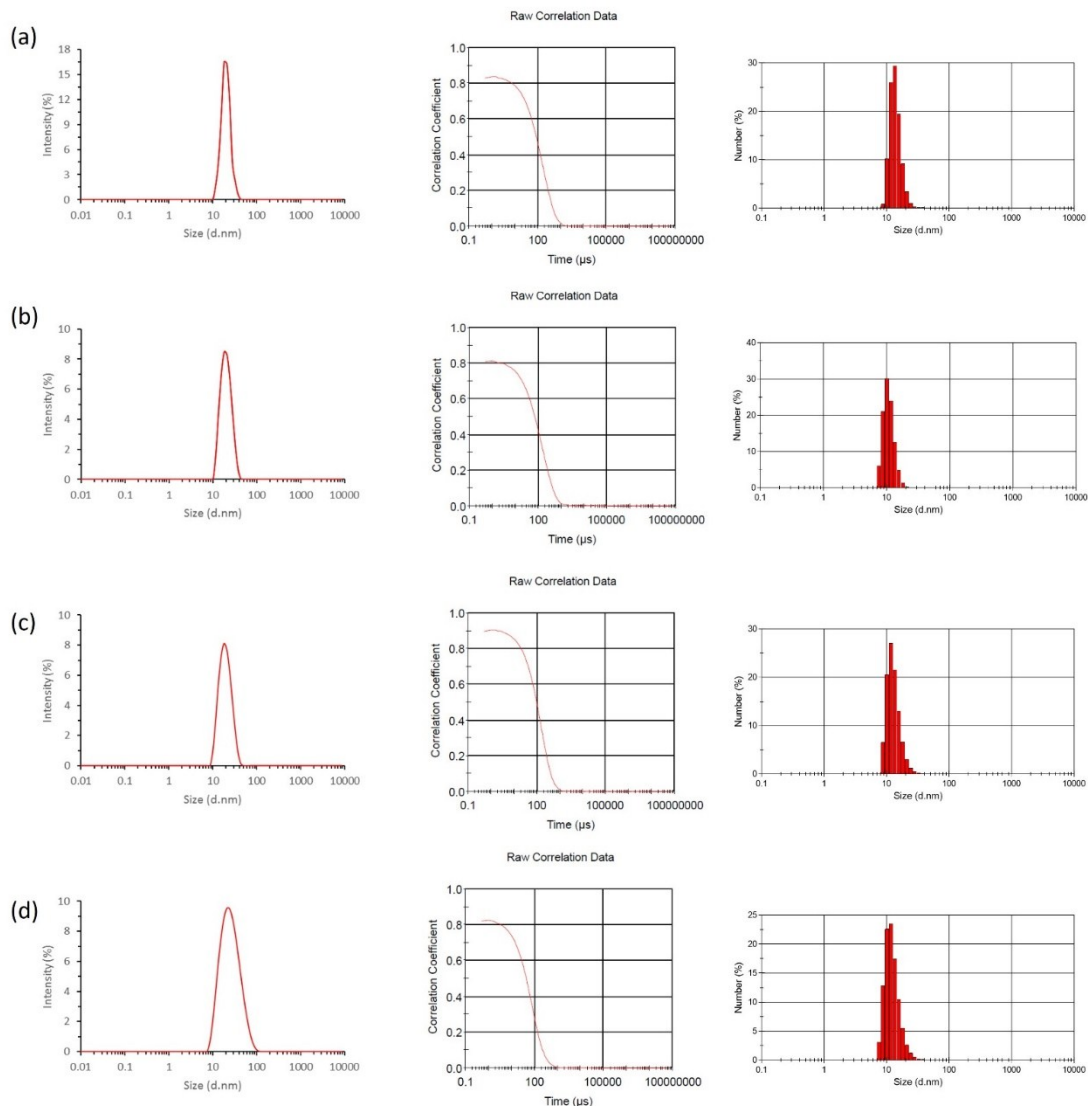

Figure S1 Figure. Size distribution determined by DLS at pH 7.4: (a) BM (empty micelles), (b) AM (AHU-1 encapsulated micelles), (c) CM (Ce6 encapsulated micelles) and (d) CAM (AHU-1/Ce6 co-encapsulated micelles).

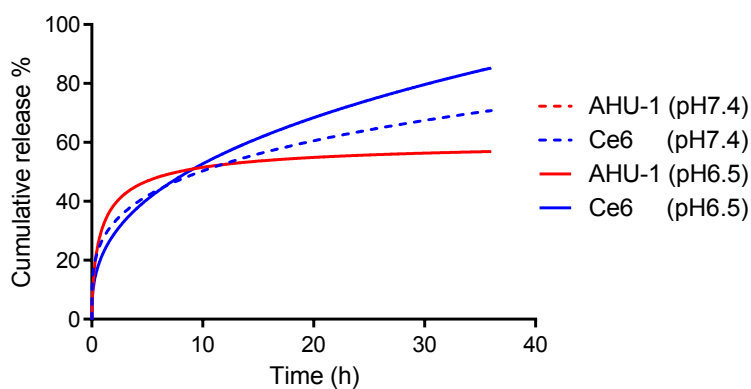

Figure S2 *In vitro* cumulative releasing profiles of CAM at pH 6.5 and pH 7.4.

Table S1 Particle sizes of CAM measured from TEM image

| Sizes (nm) | Average (nm) | SD    |
|------------|--------------|-------|
| 20.92      | 27.15        | 11.30 |
| 29.66      |              |       |
| 51.69      |              |       |
| 47.88      |              |       |
| 43.22      |              |       |
| 31.64      |              |       |
| 17.25      |              |       |
| 21.53      |              |       |
| 15.09      |              |       |
| 30.49      |              |       |
| 46.54      |              |       |
| 20.04      |              |       |
| 20.76      |              |       |
| 14.83      |              |       |
| 25.61      |              |       |
| 30.34      |              |       |
| 18.22      |              |       |
| 21.19      |              |       |
| 17.37      |              |       |
| 20.55      |              |       |
| 25.25      |              |       |
